# Supplementary material
Source: ML conference proceedings conference paper supplement (https://openaccess.thecvf.com/content/WACV2025/html/Dehaghi_Reversing_the_Damage_WACV_2025_paper.html)
Supplement: Supplementary file 1 [file Dehaghi_Reversing_the_Damage_WACV_2025_supplemental.pdf]

# Reversing the Damage: A QP-Aware Transformer-Diffusion Approach for 8K Video Restoration under Codec Compression

## – Supplementary Materials –

Ali Mollaahmadi Dehaghi

University of Calgary  
Calgary, AB, Canada

ali.mollaahmadidehag@ucalgary.ca

Reza Razavi

Useful Corporation  
Calgary, AB, Canada

reza.razavi@useful.com

Mohammad Moshirpour

University of California, Irvine  
Irvine, CA, USA

mmoshirp@uci.edu

### A. More Results

**Table 1.** PSNR Performance of *DiQP* on AV1 Codec with Various QPs

| QP  | Dataset | Output | Input  |
|-----|---------|--------|--------|
| 51  | SEPE8K  | 42.171 | 37.544 |
|     | UVG     | 37.001 | 35.124 |
| 102 | SEPE8K  | 40.478 | 36.774 |
|     | UVG     | 35.772 | 34.286 |
| 153 | SEPE8K  | 38.762 | 35.816 |
|     | UVG     | 34.962 | 33.644 |
| 204 | SEPE8K  | 36.818 | 34.564 |
|     | UVG     | 33.871 | 32.740 |

**Table 2.** SSIM Performance of *DiQP* on AV1 Codec with Various QPs

| QP  | Dataset | Output | Input  |
|-----|---------|--------|--------|
| 51  | SEPE8K  | 0.9304 | 0.9105 |
|     | UVG     | 0.9148 | 0.8981 |
| 102 | SEPE8K  | 0.9047 | 0.8886 |
|     | UVG     | 0.8924 | 0.8788 |
| 153 | SEPE8K  | 0.8852 | 0.8708 |
|     | UVG     | 0.8831 | 0.8699 |
| 204 | SEPE8K  | 0.8730 | 0.8584 |
|     | UVG     | 0.8731 | 0.8587 |

In this section, we delve deeper into the quantitative and qualitative results obtained from our model. Fig. 1

**Table 3.** PSNR Performance of *DiQP* on HEVC Codec with Various QPs

| QP | Dataset | Output | Input  |
|----|---------|--------|--------|
| 12 | SEPE8K  | 43.063 | 38.036 |
|    | UVG     | 38.396 | 36.018 |
| 33 | SEPE8K  | 38.099 | 35.808 |
|    | UVG     | 34.882 | 33.590 |
| 42 | SEPE8K  | 35.829 | 34.385 |
|    | UVG     | 33.660 | 32.665 |

**Table 4.** SSIM Performance of *DiQP* on HEVC Codec with Various QPs

| QP | Dataset | Output | Input  |
|----|---------|--------|--------|
| 12 | SEPE8K  | 0.9456 | 0.9241 |
|    | UVG     | 0.9307 | 0.9133 |
| 33 | SEPE8K  | 0.8842 | 0.8704 |
|    | UVG     | 0.8835 | 0.8684 |
| 42 | SEPE8K  | 0.8695 | 0.8564 |
|    | UVG     | 0.8728 | 0.8571 |

showcases frame 179 from sequence 26 of the SEPE8K dataset, along with our model’s output. To better illustrate our model’s performance, we highlight three specific crops from this frame: 1) the in-focus “bag” crop, demonstrating the model’s ability to handle sharp details, 2) the out-of-focus “hat” crop with its intricate winter hat texture, testing the model’s performance on challenging patterns, and 3) the out-of-focus “jacket” crop, further evaluating the model’s ability to reconstruct detailed textures in less-than-ideal conditions. Our findings highlight that our model con-

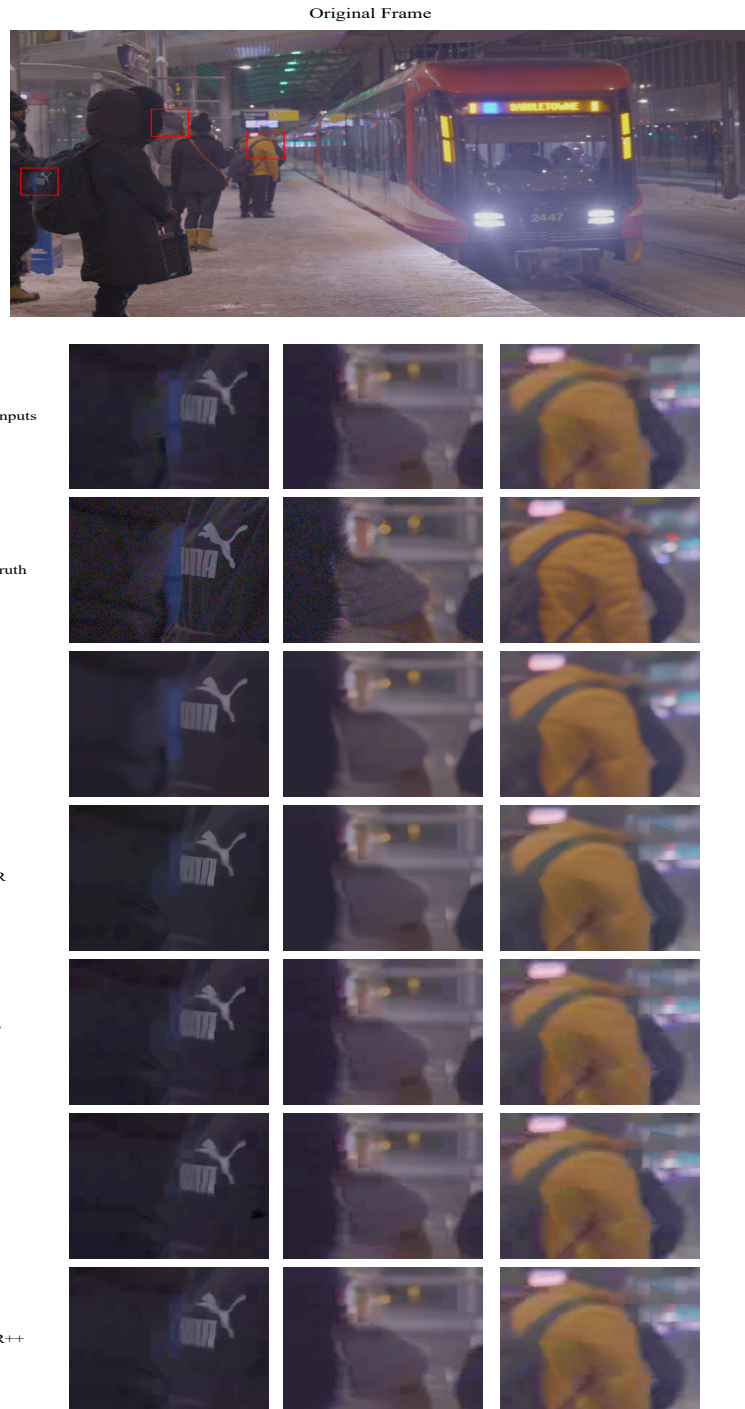

**Figure 1.** Visual comparisons of different methods on sequence 26 of SEPE8K encoded with QP=255 on AV1

sistently delivers high-quality results in both in-focus and out-of-focus scenarios, effectively handling various textures

and sharpness levels, unlike other models that struggle in such diverse situations.

To validate our model’s robustness, we evaluated its performance under a range of compression levels (QPs). This included not only the most challenging highest QP scenario but also lower QPs to ensure comprehensive learning. As detailed in Tables 1, 2, 3, and 4, our model consistently demonstrates strong performance across various compression levels, from the least to the most compressed videos. Intuitively, our *DiQP* exhibits a notably stronger performance advantage at lower QPs, with a margin of approximately 5 dB in the SEPE8K dataset and around 2 dB in the UVG dataset. This shows a superior ability to leverage the additional information available in less compressed videos.
